# Supplementary material for: A simplified and defined serum-free medium for cultivating fat across species
Source: PubMed Central journal article supplement (PMC9830212; doi:10.1016/j.isci.2022.105822), 2022-12-17
Supplement: mmc1.pdf [file mmc1.pdf]

iScience, Volume 26

## **Supplemental information**

### **A simplified and defined serum-free medium for cultivating fat across species**

**Rada Mitić, Federica Cantoni, Christoph S. Börlin, Mark J. Post, and Laura Jackisch**

## List of abbreviations and acronyms used in the paper

| <b>Abbreviation</b> | <b>Definition</b>                                                          |
|---------------------|----------------------------------------------------------------------------|
| 3%FBS               | Serum containing differentiation media (DMEM + 3% FBS)                     |
| -ctrl               | No inducers (apart from insulin in DMAD), i.e. maintenance media           |
| cDM (2D)            | Control differentiation medium. Induction (4 days) → Progression (4 days)  |
| cDM (3D)            | Control differentiation medium. Induction (4 days) → Progression (24 days) |
| d                   | Days                                                                       |
| DMAD                | In-house developed Defined Media for Adipogenic Differentiation            |
| Dex                 | Dexamethasone                                                              |
| FA                  | Fatty acid                                                                 |
| HC/PR               | Hydrocortisone and progesterone                                            |
| I                   | Induction (i.e. rosiglitazone + insulin + dexamethasone + IBMX)            |
| Ins                 | Insulin                                                                    |
| IBMX                | 3-Isobutyl-1-methylxantine                                                 |
| M                   | Maintenance media (i.e., no inducers apart from insulin)                   |
| P                   | Progression media (i.e., rosiglitazone + insulin)                          |
| PUFA                | Poly-unsaturated fatty acid                                                |
| RA                  | Retinoic acid                                                              |
| Ros                 | Rosiglitazone                                                              |
| rDM (2D & 3D)       | Reduced differentiation medium (rosiglitazone and insulin the whole time)  |
| VFA                 | Volatile fatty acid                                                        |
| v                   | Vitamin                                                                    |

| <b>Gene abbreviation</b>        | <b>Gene name</b>                                       |
|---------------------------------|--------------------------------------------------------|
| ACC                             | Acetyl-CoA carboxylase 1                               |
| ADIPOQ                          | Adiponectin                                            |
| CIDEA                           | Cell death activator                                   |
| PPAR $\gamma$ 2 / PPAR $\gamma$ | Peroxisome proliferator-activated receptor gamma (two) |
| C/EBP                           | CCAAT enhancer binding proteins                        |
| SCD                             | Stearoyl-CoA desaturase                                |
| PLIN1                           | Perilipin 1                                            |
| UCP-1                           | Uncoupling protein-1                                   |
| ELOVL6                          | Elongation of very long chain fatty acids protein 6    |
| APOE                            | Apolipoprotein E                                       |
| COX6A1                          | Cytochrome c oxidase subunit 6A1                       |

**Induction / Progression components**

| Reference                                   | Basal media (+) FBS concentration | Days between media changes | Insulin concentration | Rosiglitazone concentration | Dexamethasone concentration | IBMX concentration | Other DM components                     |
|---------------------------------------------|-----------------------------------|----------------------------|-----------------------|-----------------------------|-----------------------------|--------------------|-----------------------------------------|
| doi.org/10.2508/chikusan.69.439             | DMEM:Ham-F12 (1:1), SF            | 10                         | 10 µg/ml              | -                           | -                           | -                  | vC, vB5, vH, vB7, Transferrin           |
| doi:10.1016/j.ygeno.2012.06.005             | DMEM/F12 + 10% FBS                | 2                          | 5 ng/ml               | -                           | 10 nM                       | -                  | vC, vB5, vH, T3, lipids                 |
| doi.org/10.5713/ajas.2013.13559             | DMEM + 10% FBS                    | 2                          | 50 ng/ml              | 0 µM / 5 µM                 | 250 nM                      | -                  | Octanoate, acetate                      |
| doi.org/10.3390/ijms151121401               | DMEM + 5% FBS                     | 2                          | 5 µg/ml / 5 µg/ml     | 5 µM / 5 µM                 | 0.25 µM                     | 0.5 mM             | -                                       |
| doi.org/10.1007/s11626-017-0205-7           | DMEM + 10% FBS                    | 21                         | 10 µM / 10 µM         | -                           | 1 µM / 1 µM                 | 0.5 mM / 0.5 mM    | Indomethacine 200µM                     |
| doi:10.1017/S1751731118000150               | DMEM + 10% FBS                    | 3                          | 1 µg/ml / 1 µg/ml     | -                           | 0.1 µg/ml                   | 27.8 µg/ml         | -                                       |
| doi.org/10.3168/jds.2018-15626              | DMEM/F12 + 10% FBS                | 2                          | 5 µg/ml / 5 µg/ml     | (Troglitazone) 5 µM / 5 µM  | 1 µM                        | 0.5 mM             | Acetate                                 |
| doi:10.1111/asj.12101                       | DMEM + 10% FBS                    | 2                          | 10 µg/ml / 5 µg/ml    | -                           | 1 µM                        | 0.5 mM             | RA                                      |
| doi:10.1016/j.cbd.2010.06.004               | DMEM/F12+10%FBS                   | 3                          | 5 ng/ml / 5 ng/ml     | -                           | 10 nM / 10 nM               | 0.1 µM / 0.1 µM    | vC, vH, vB5, lipids, T3                 |
| doi: 10.1159/000329254                      | DMEM/F12+10%FBS                   | 2                          | 2.5 µg/ml / 2.5 µg/ml | (Troglitazone) 5 µM / 5 µM  | 0.25 µM                     | 0.5 mM             | -                                       |
| doi:10.1016/j.abb.2019.108236               | DMEM/F12 + 10%FBS                 | 2                          | 167 nM / 167 nM       | -                           | 1 µM                        | 0.5 mM             | Hydrocortisone                          |
| doi:10.1007/s11745-013-3823-1               | DMEM + 5% FBS                     | -                          | 2.5 µg/ml / 2.5 µg/ml | (Troglitazone) 5 µM / 5 µM  | 0.25 µM                     | 0.5 mM             | Acetate                                 |
| doi.org/10.17582/journal.pjz/20190718150746 | -                                 | 3                          | 3 µg/ml / 3 µg/ml     | 1 mM                        | 1 mM                        | 0.5 mM             | BMP4                                    |
| doi:10.2527/jas.2008-0860                   | DMEM                              | 2                          | 280 nM                | (Troglitazone) 40 µM        | 0.25 mM                     | -                  | vB7, vB5, vC, lipid supplement, glucose |

**Table S1. Selection of different bovine adipogenic differentiation protocols. Related to Figure 1.** The use of various traditional differentiation cocktails demonstrates the discrepancy between compounds in use and their concentrations.

| <b>Gene name</b>               | <b>Primer sequence</b> |                           |
|--------------------------------|------------------------|---------------------------|
| <i>UXT</i>                     | Fwd                    | 5'-GAGCAGTCTCCTCACAGAGCTC |
|                                | Rev                    | 5'-AGCAACATGTGGATATGGGCCT |
| <i>RPL19</i>                   | Fwd                    | 5'-TCGAATGCCCCGAGAAGGTAAC |
|                                | Rev                    | 5'-CTGTGATACATGTGGCGGTC   |
| <i>RPLP0</i>                   | Fwd                    | 5'-GGCAGCATCTACAACCCTGA   |
|                                | Rev                    | 5'-CAGATGCGACGGTTGGGTAA   |
| <i>ADIPOQ</i>                  | Fwd                    | 5'-GGCTCTGATTCCACACCTGA   |
|                                | Rev                    | 5'-TGTTGTCCTCGCCATGACTG   |
| <i>CIDEA</i>                   | Fwd                    | 5'-TGCAGAGTAACCACTGCTGA   |
|                                | Rev                    | 5'-ACGCCAGCATCAGGGTATC    |
| <i>PPAR<math>\gamma</math></i> | Fwd                    | 5'-TGTCACAGTGTCTGCAAGGACC |
|                                | Rev                    | 5'-ACGGAGCTGATCCCAAAGTTGG |
| <i>SCD</i>                     | Fwd                    | 5'-GACCTAAGAGCCGAGAAGCTGG |
|                                | Rev                    | 5'-ATCCCACAGATACCATGGCACG |

**Table S2. Primer sequences for RT-qPCR. Related to STAR Methods.**

| <b>Media</b>                                         | <b>Component</b>                                           | <b>Concentration</b> |
|------------------------------------------------------|------------------------------------------------------------|----------------------|
| Growth Medium (GM)                                   | DMEM +                                                     | -                    |
|                                                      | Fetal Bovine Serum (FBS)                                   | 10%                  |
|                                                      | FGF2                                                       | 2 ng/ml              |
|                                                      | Penicillin/Streptomycin/Amphotericin (PSA)                 | 1%                   |
| Serum-Free Growth Medium (SFGM)                      | DMEM/F12 +                                                 | -                    |
|                                                      | Chemically-defined FBS replacement (Kolkmann et al., 2022) | 1%                   |
|                                                      | PSA                                                        | 1%                   |
| 3% FBS Differentiation Medium (3%FBS)                | DMEM +                                                     | -                    |
|                                                      | FBS                                                        | 3%                   |
|                                                      | PSA                                                        | 1%                   |
|                                                      | ± Insulin                                                  | 10 µg/ml             |
|                                                      | ± Rosiglitazone                                            | 5 µM                 |
|                                                      | ± IBMX                                                     | 0.5 mM               |
|                                                      | ± Dexamethasone                                            | 1 µM                 |
| Defined Medium for Adipogenic Differentiation (DMAD) | DMEM/F-12 +                                                | -                    |
|                                                      | PSA                                                        | 1%                   |
|                                                      | HEPES                                                      | 4.9 mM               |
|                                                      | Lipid concentrate                                          | 0.1%                 |
|                                                      | Putrescine                                                 | 57 µM                |
|                                                      | ± Progesterone                                             | 17.8 nM              |
|                                                      | ± Hydrocortisone                                           | 25 nM                |
|                                                      | Calcium Chloride                                           | 1 mM                 |
|                                                      | L-Ascorbic acid 2-phosphate                                | 227 µM               |
|                                                      | Glucose                                                    | 17 mM                |
|                                                      | FGF2                                                       | 2 ng/ml              |
|                                                      | EGF1                                                       | 2 ng/ml              |
|                                                      | BMP4                                                       | 10 ng/ml             |
|                                                      | ± Insulin                                                  | 10 µg/ml             |
|                                                      | ± Rosiglitazone                                            | 5 µM                 |
| ± IBMX                                               | 0.5 mM                                                     |                      |
| ± Dexamethasone                                      | 1 µM                                                       |                      |

**Table S3. Composition of proliferation and differentiation media used in this study. Related to STAR Methods.**

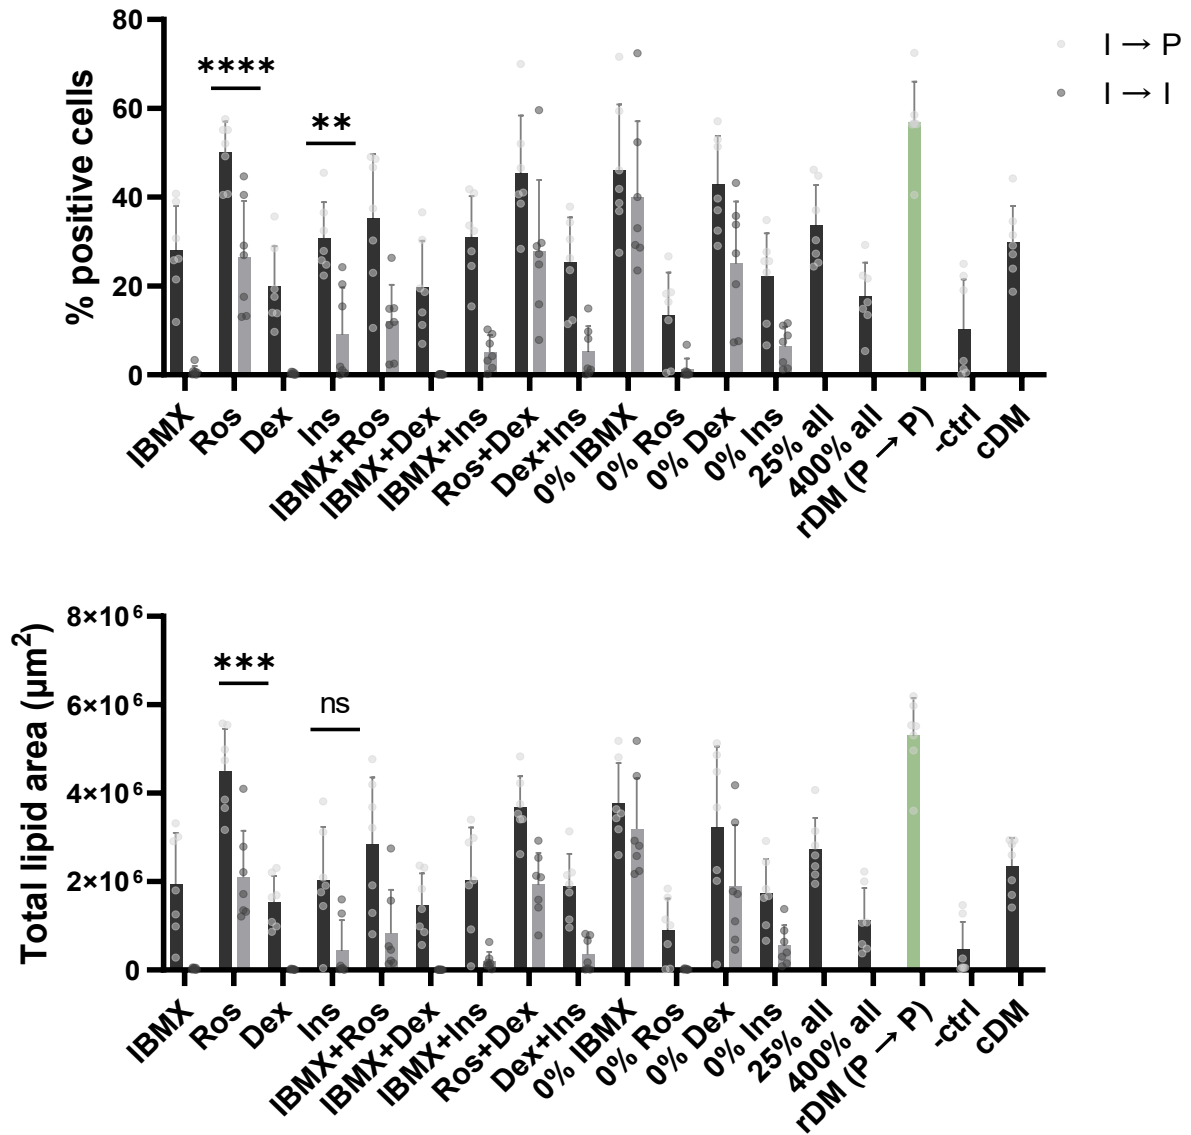

**Figure S1. Quantitative assessment of adipogenic differentiation with different inducer combinations at day 8. Related to Figure 3.**

Different combinations of differentiation medium compounds were used to investigate the necessity of adipogenic inducers. I → P indicates compounds present only during first media change, followed by progression in the second media change. Alternatively, I → I indicates compounds/combinations maintained throughout 8 days of differentiation (inducers were supplemented in first and second media changes). Data are represented as mean  $\pm$  SD; the error bars represent the SD of 4 independent experiments using 4 donors. One or two-way ANOVA; NS, not significant; \*\*P < 0.01; \*\*\*P < 0.001 and \*\*\*\*P < 0.0001.



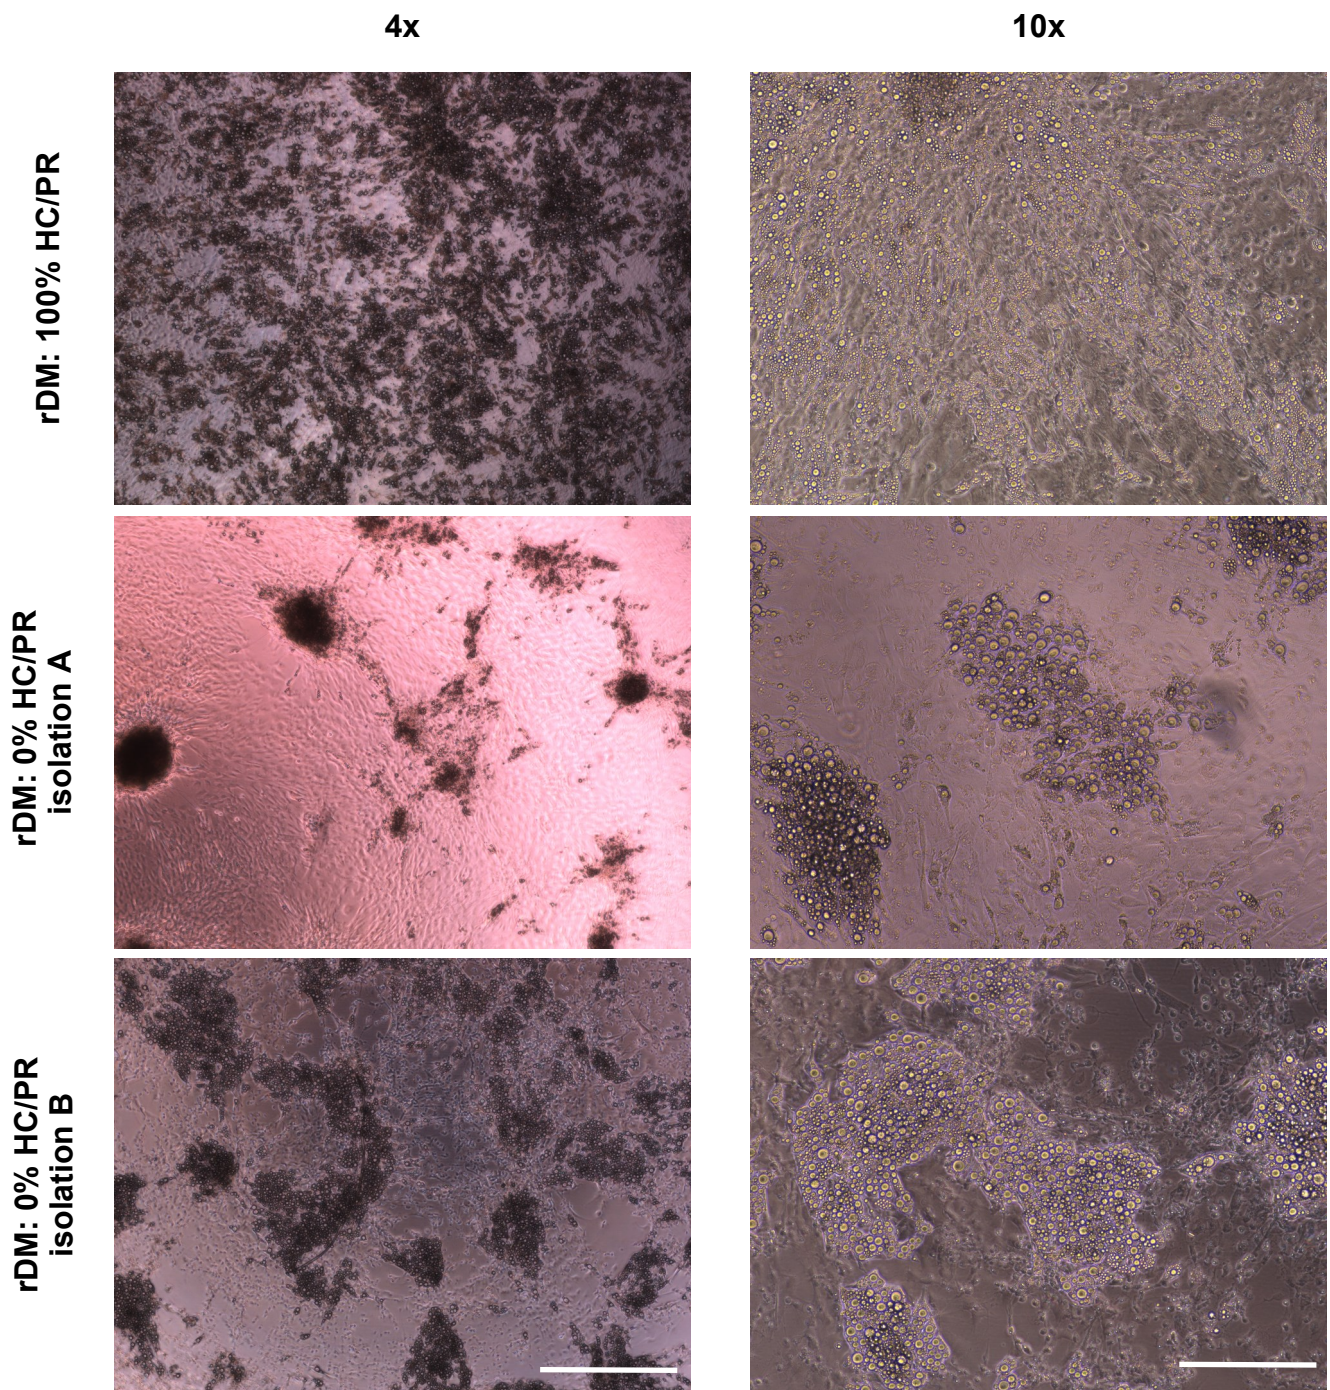

**Figure S2. Excluding all the GC receptor activating molecules (HC/PR) resulted in islands of differentiation and cell death in specific isolations. Related to Figure 3d.**

SVC were proliferated in SFGM and differentiated with rDM, or rDM without HC/PR. Pictures were taken at day 12, before harvesting mRNA from two independent donors. Scale bars 700  $\mu\text{m}$  (4x magnification) or 300  $\mu\text{m}$  (10x magnification).



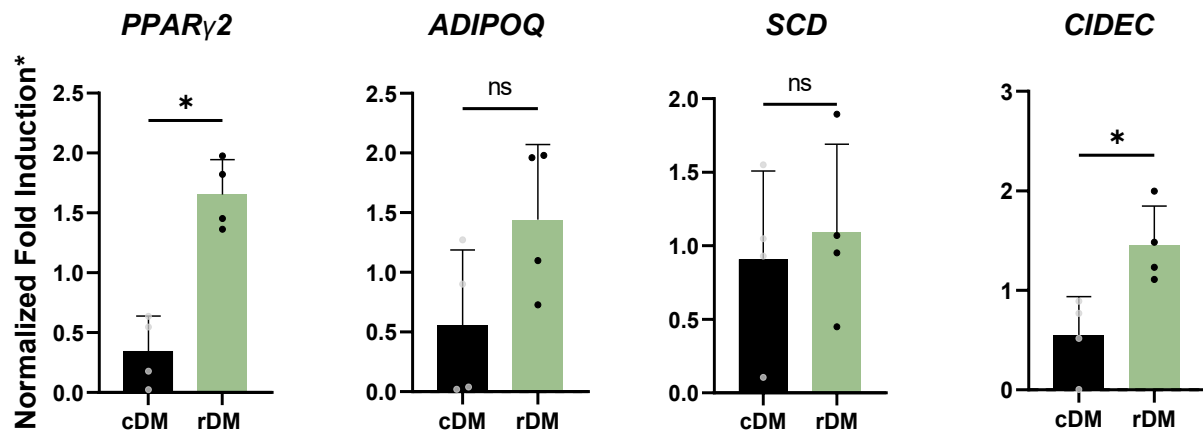

**Figure S3. Cells differentiated with rDM present higher expression of two adipogenic markers in 3% FBS. Related to Figure 4a.**

Mean normalized gene expression fold changes 12 days after induction of differentiation determined by qPCR. All conditions were normalised to a chosen set of reference genes (*UXT*, *RPLP*, *L19*) and to day 0 control (not shown); \*mean  $2^{-\Delta\Delta C_t}$  values of each condition were divided by the average of same isolation to improve comparability between conditions. Data are represented as mean  $\pm$  SD; the error bars represent the SD of 4 independent experiments using 4 donors. One-way ANOVA; NS, not significant; \*P < 0.05.

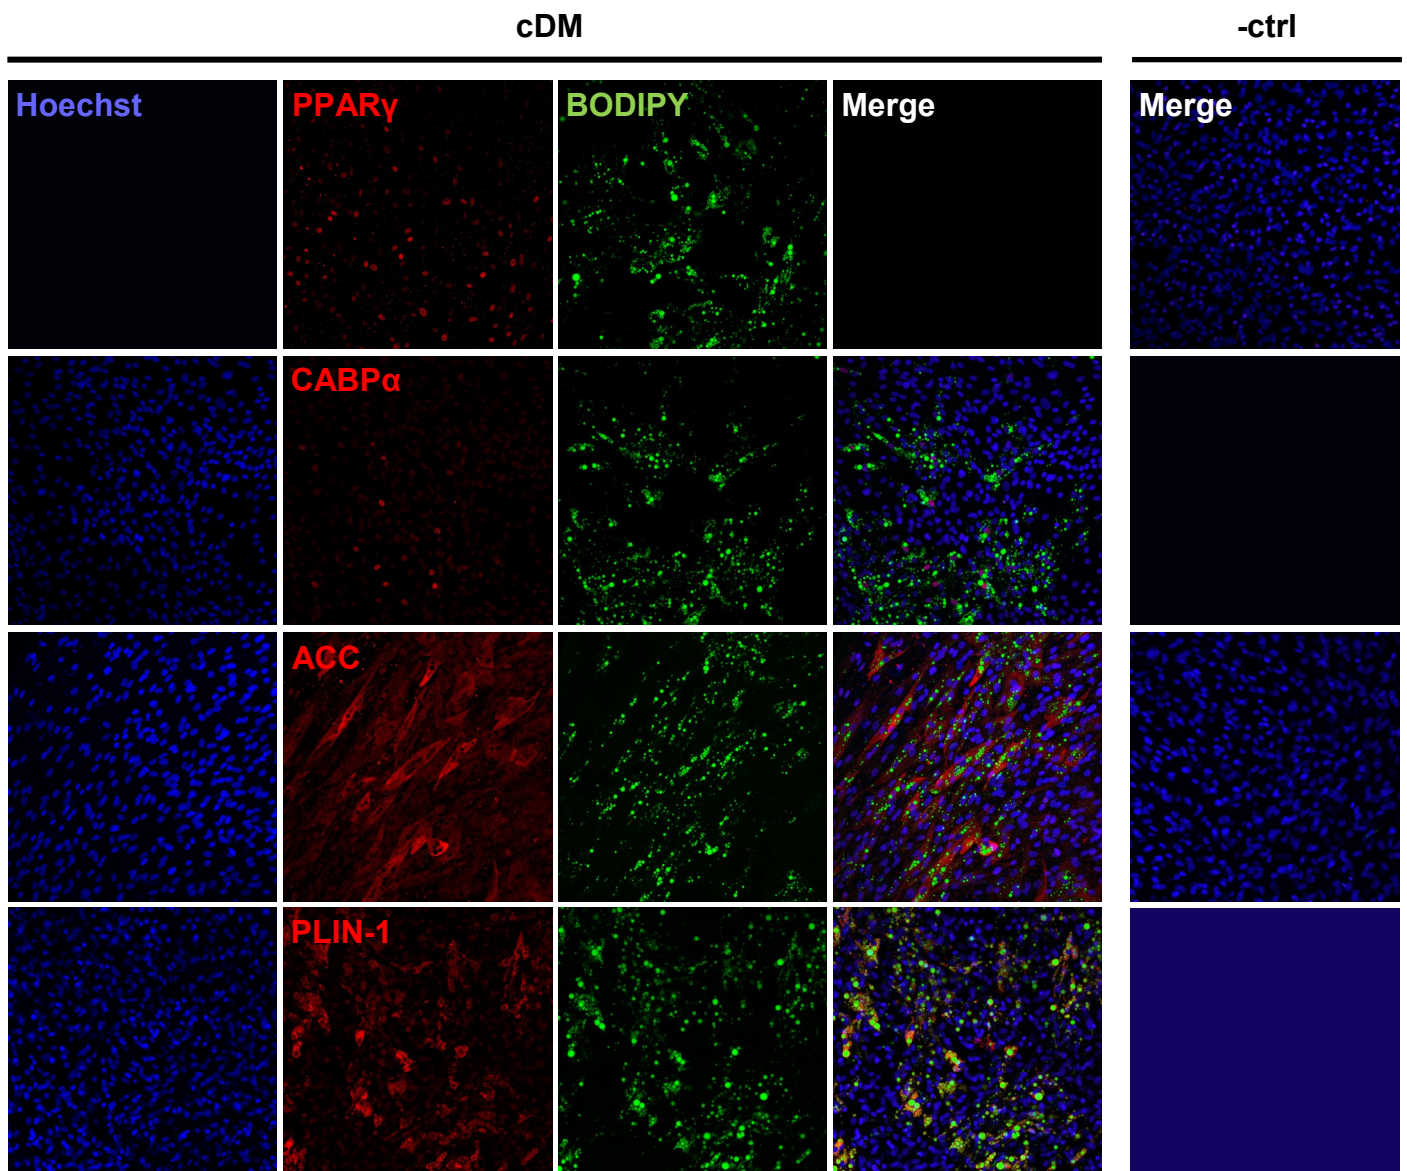

**Figure S4. Immunohistochemical analysis of bovine SVC. Related to Figure 4b.**

Cells were differentiated with control differentiation medium (cDM; I  $\rightarrow$  P) or negative control (no inducers, except insulin) for 8 days. Scale bar, 100  $\mu$ m.



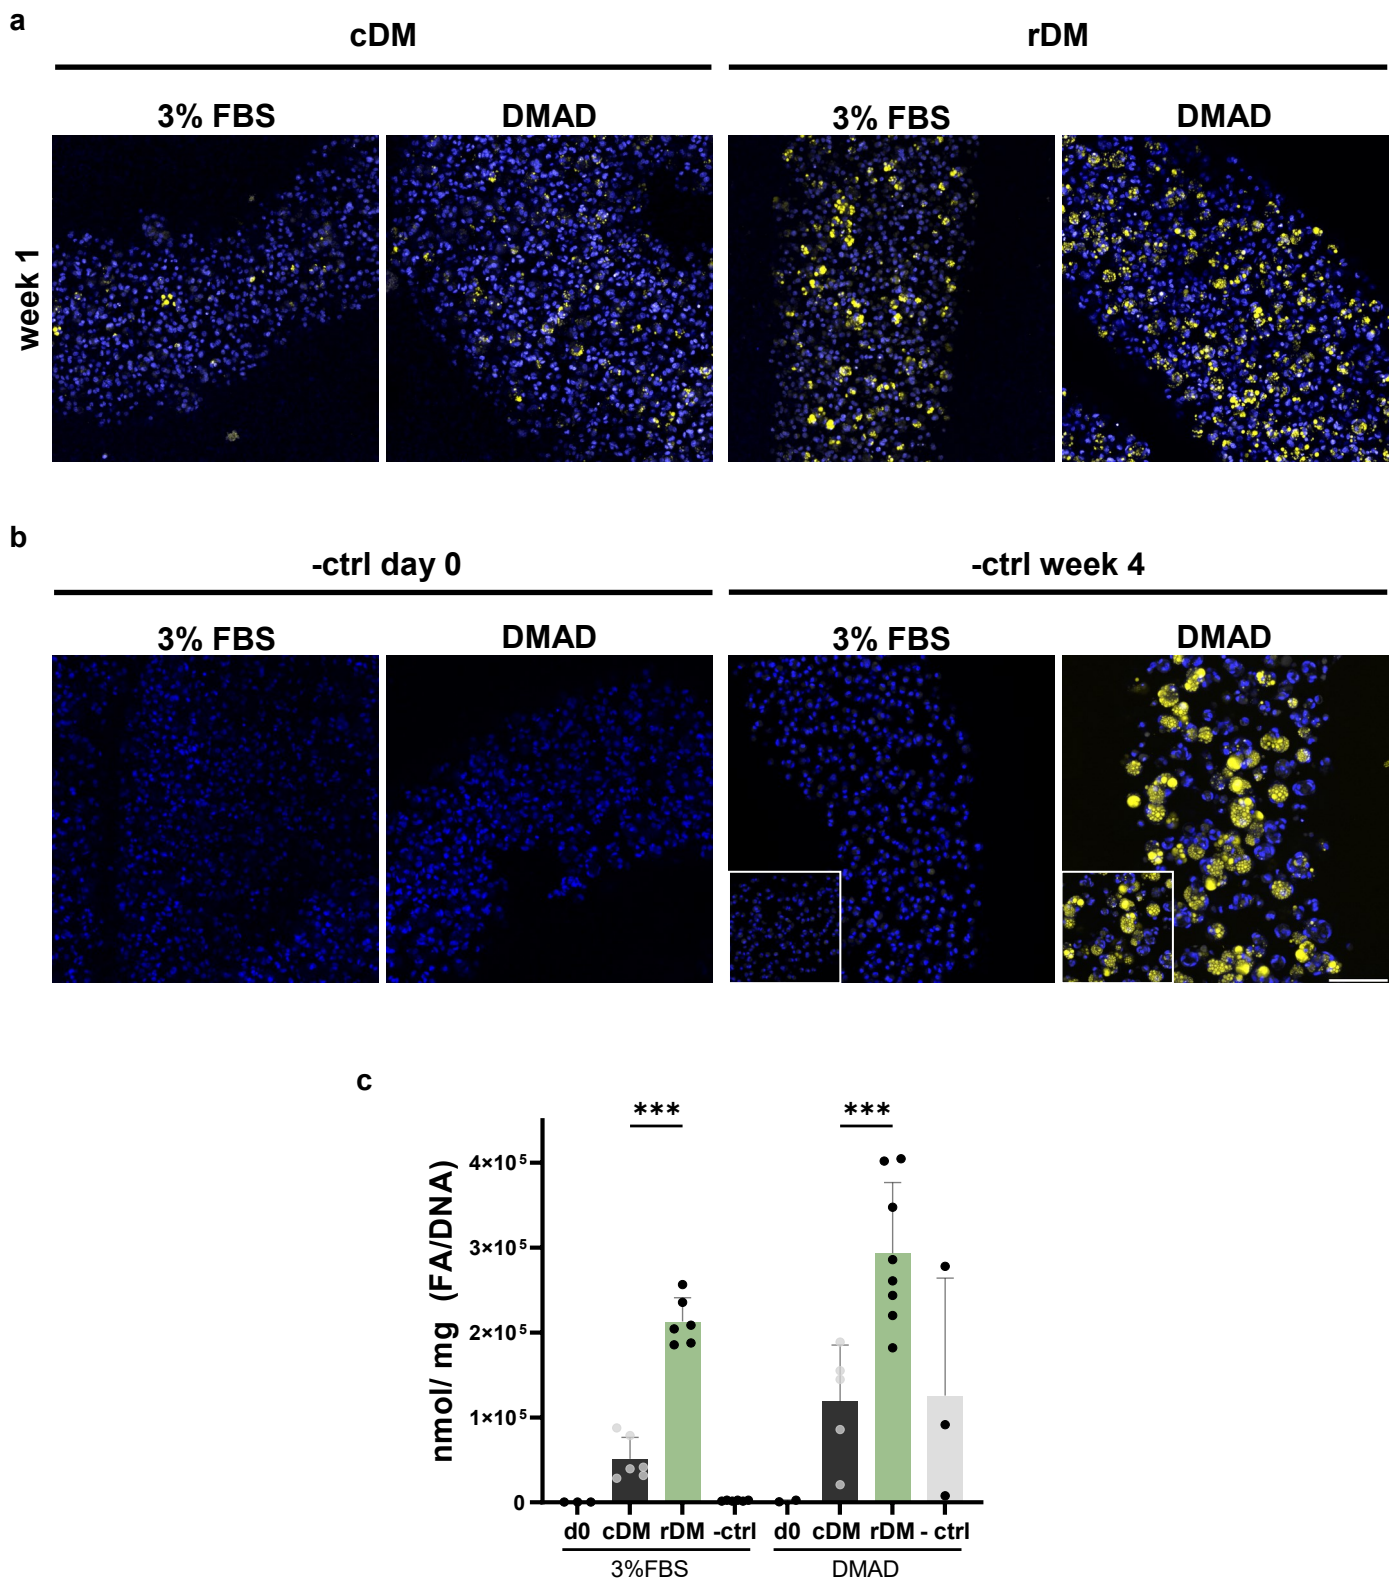

**Figure S5. At week one rDM already outperforms cDM. Related to Figure 5.**

Bovine SVC were differentiated in alginate fibres with 3%FBS or DMAD with the standard differentiation cocktail (cDM), rDM or negative control (-ctrl DMAD contains insulin and HC/PR). The culture was stopped at weeks 1 and 4. **a**, Representative images of rDM and cDM after one week of differentiation in 3%FBS or DMAD. **b**, Negative control differentiation at day 0 and week 4. **c**, Fatty acid quantity within triglycerides (TG) normalised to the amount of DNA. Data are represented as mean  $\pm$  SD; the error bars represent the SD of 3-5 independent experiments using 2-5 donors. Statistical analyses were performed using a one-way ANOVA; \*\*\* $P < 0.001$ . Scale bar, 100  $\mu$ m.

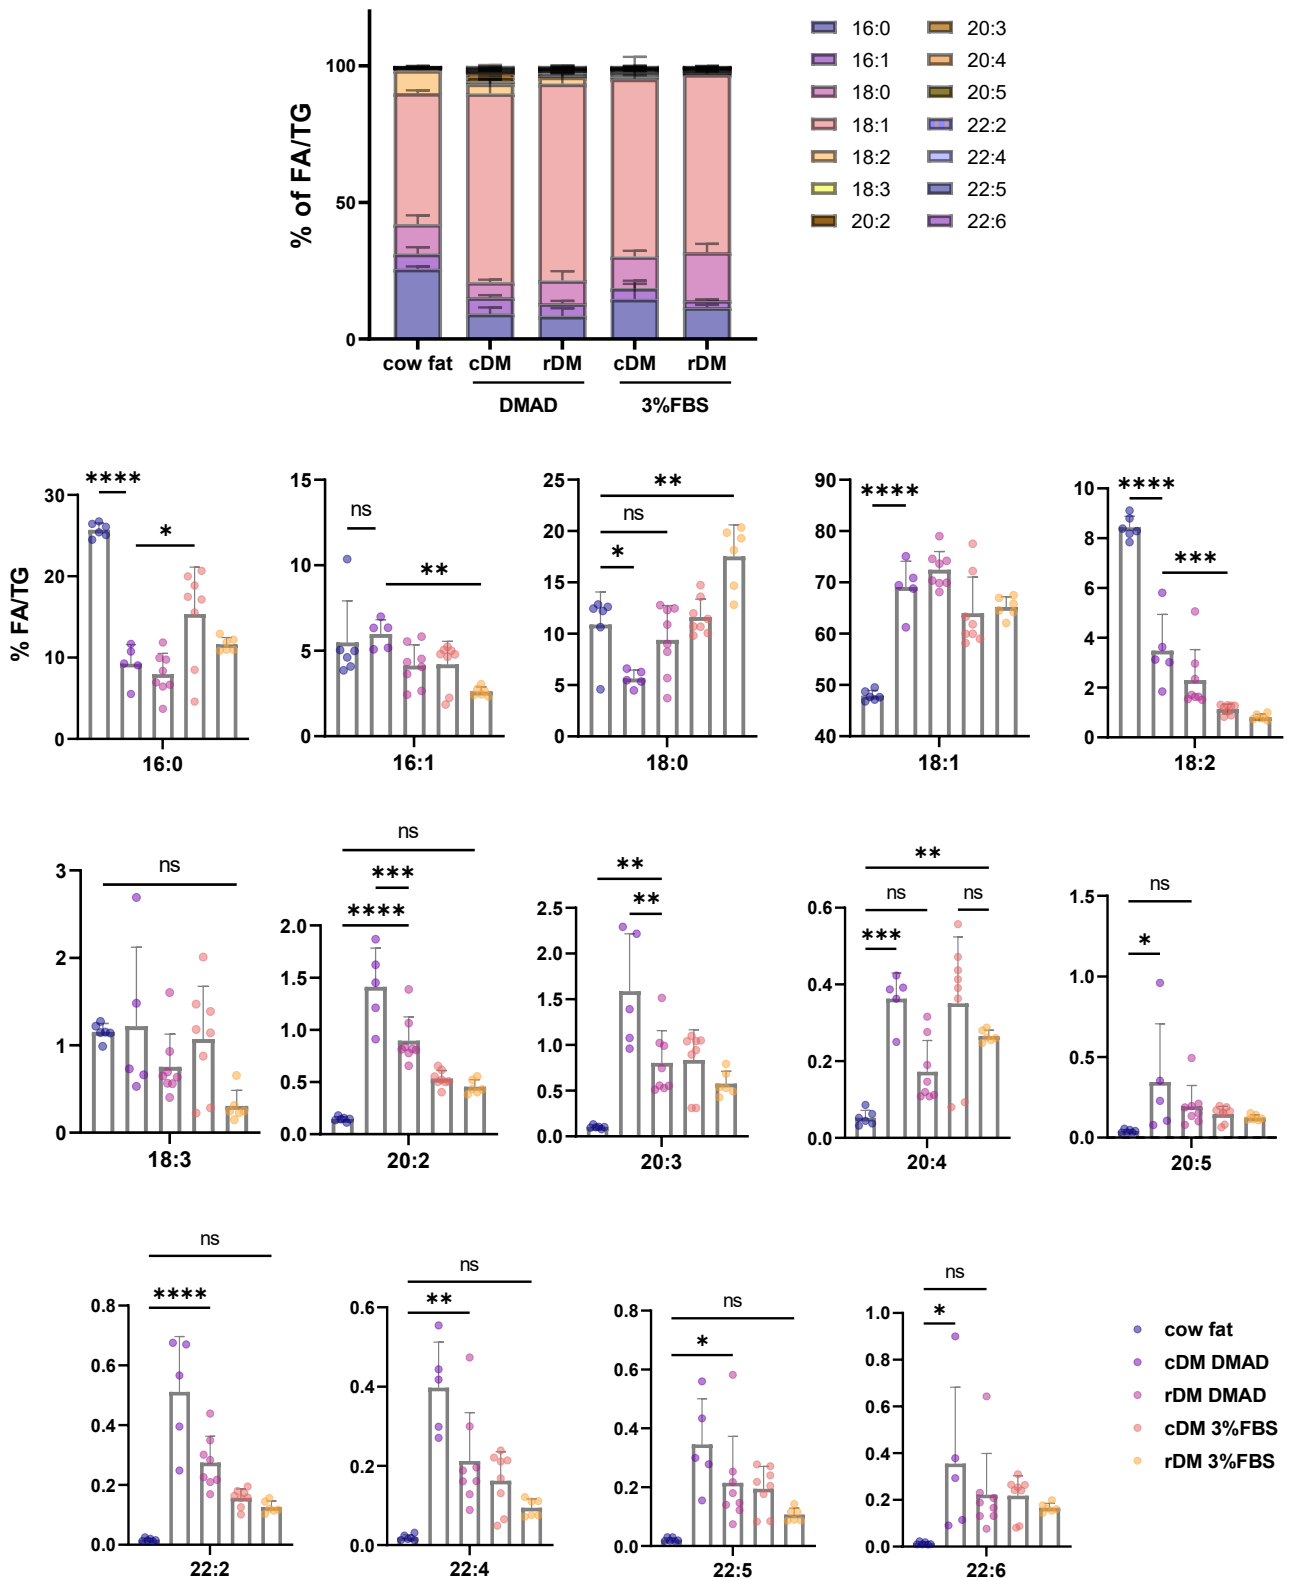

**Figure S6. Lipidomic assessment of fatty acid percentage within triglycerides. Related to Figure 5e.**

Bovine SVC were differentiated in alginate fibres with 3%FBS or DMAD with standard differentiation cocktail (ctrl) or rDM for 28 days. Fibres were collected and analysed at week 4. Data are represented as mean  $\pm$  SD; the error bars represent the SD of 3 to 5 independent experiments,  $n=5$  donors (cDM DMAD);  $n=8$  donors (rDM DMAD and cDM 3%FBS);  $n=6$  donors (bovine fat and rDM 3%FBS). Statistical analyses were performed using a one-way ANOVA; NS, not significant; \* $P < 0.05$ ; \*\* $P < 0.01$ ; \*\*\* $P < 0.001$ ; and \*\*\*\* $P < 0.0001$ .

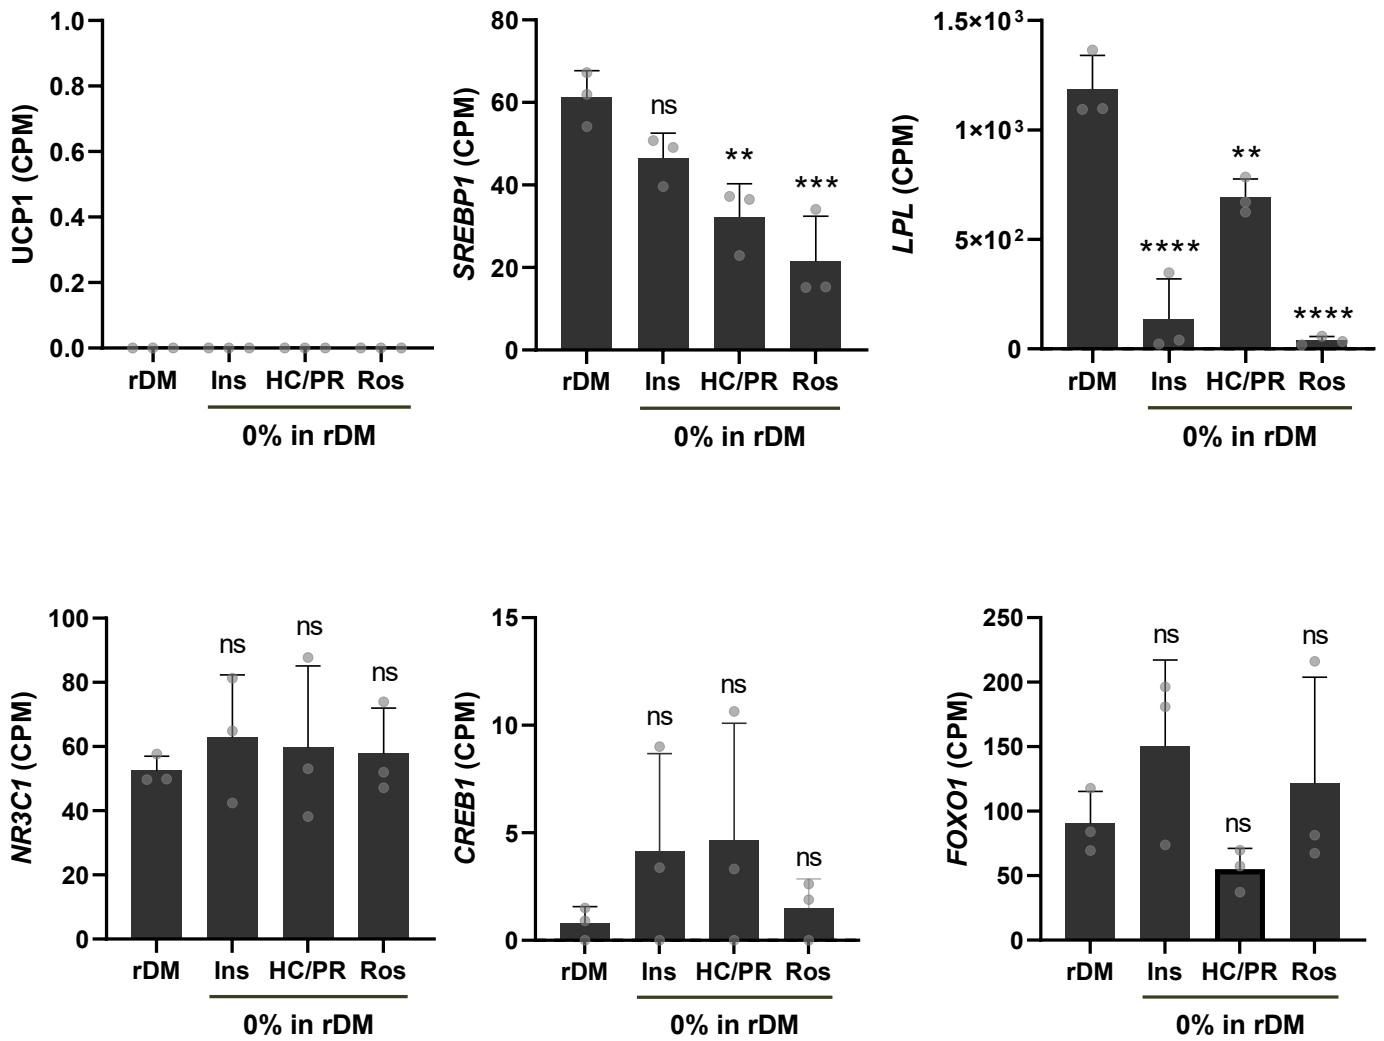

**Figure S7. Transcriptomic analysis demonstrates impact of insulin, rosiglitazone and glucocorticoid receptor binding molecules on adipogenic markers. Related to Figure 6c.**

SVC were proliferated in SFGM and differentiated with rDM, or rDM without insulin, rosiglitazone or HC/PR. mRNA was harvested at day 12. Selection of differentially expressed gene: Uncoupling protein 1 (*UCP1*), a major marker of brown adipogenesis; Sterol regulatory element binding protein-1 (*SREBP-1*); Lipoprotein lipase (*LPL*) tryglyceride metabolism; Glucocorticoid receptor (*NR3C1*); Cyclic AMP-responsive element-binding protein 1 (*CREB*); and Forkhead box protein O1 (*FOXO1*). Data are represented as mean  $\pm$  SD; the error bars represent the SD of 3 independent experiments using 3 donors. Statistical analyses and comparisons were performed using a two-way ANOVA; NS, not significant; \*\* $P < 0.01$ ; \*\*\* $P < 0.001$ ; and \*\*\*\* $P < 0.0001$ .
